# Supplementary material for: Differential Virulence of Aggregatibacter actinomycetemcomitans Serotypes Explained by Exoproteome Heterogeneity
Source: PubMed Central journal article supplement (PMC9927298; doi:10.1128/spectrum.03298-22), 2022-12-21
Supplement: spectrum.03298-22-s0001.pdf [file spectrum.03298-22-s0001.pdf]

## Supporting information

### Differential virulence of *Aggregatibacter actinomycetemcomitans* serotypes explained by exoproteome heterogeneity

Yanyan Fu<sup>a</sup>, Sandra Maaß<sup>b</sup>, Francis M. Cavallo<sup>a</sup>, Anne de Jong<sup>c</sup>, Erwin Raangs<sup>a</sup>, Johanna Westra<sup>d</sup>,  
Girbe Buist<sup>a</sup>, Dörte Becher<sup>b</sup>, and Jan Maarten van Dijk<sup>a</sup>

<sup>a</sup>University of Groningen, University Medical Center Groningen, Department of Medical Microbiology, Groningen, the Netherlands

<sup>b</sup>University of Greifswald, Institute of Microbiology, Department of Microbial Proteomics, Greifswald, Germany

<sup>c</sup>University of Groningen, Groningen Biomolecular Sciences and Biotechnology Institute, Department of Molecular Genetics, 9747 AG Groningen, the Netherlands

<sup>d</sup>University of Groningen, University Medical Center Groningen, Department of Rheumatology and Clinical Immunology, Groningen, The Netherlands

# Correspondence: Jan Maarten van Dijk, University Medical Center Groningen, Department of Medical Microbiology, Hanzeplein 1, 9700RB Groningen, the Netherlands, tel. +31-50-3615187, e-mail: j.m.van.dijk01@umcg.nl

**Running title:** Virulence of *Aggregatibacter actinomycetemcomitans* in different serotypes

**Table of Contents:**

**Supplementary Figure S1.** Selection of representative *Aα* isolates with serotype a or c.

**Supplementary Figure S2.** Principal component analysis (PCA) of all identified extracellular proteins of serotype a, b and c except the outer membrane proteins (OMPs).

**Supplementary Figure S3.** Voronoi treemaps of extracellular proteins in *Aα* isolates with different serotypes.

**Available separately:**

**Supplementary Table S1.** All extracellular proteins of *Aα* bacteria with serotype a, b and c identified by Mass Spectrometry and their respective normalized spectral counts values..

**Supplementary Table S2.** Analysis of the statistical significance of differences in the virulence of *Aα* in several different human cell models.

**Supplementary Table S3.** Correlation between identified virulence factors of *Aα* and virulence in different cell infection models.

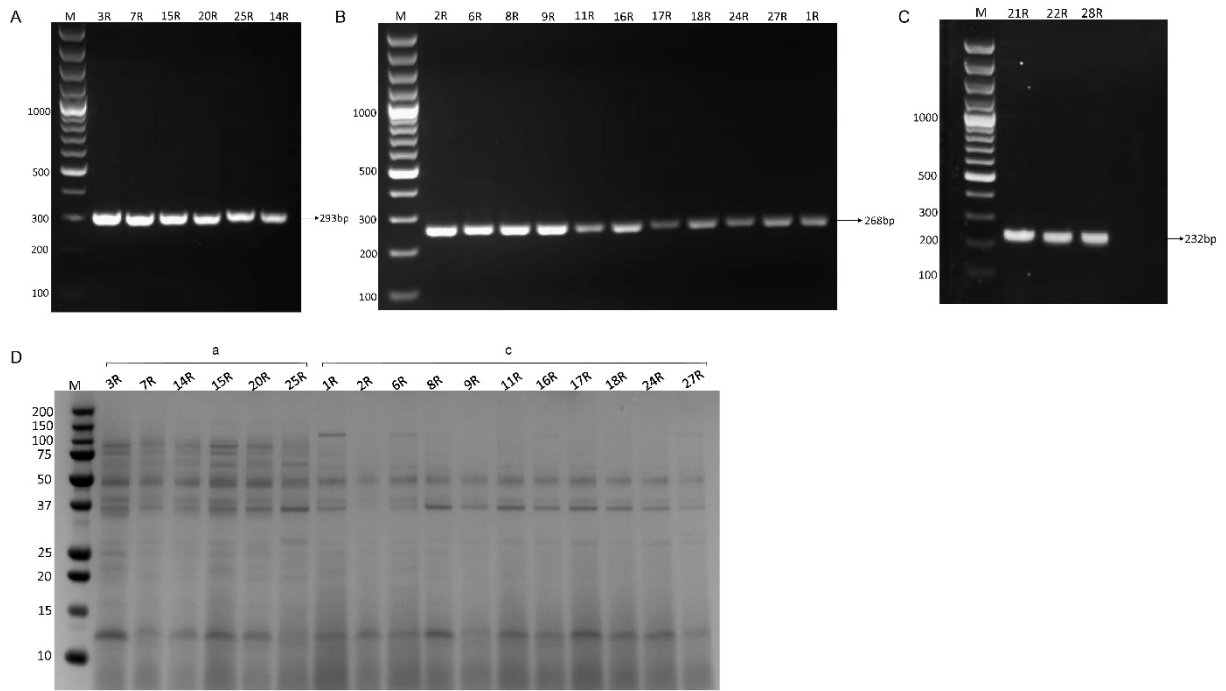

**Supplementary Figure S1. Selection of representative *Aa* isolates with serotype a or c.** PCR was performed with *Aa* serotype-specific primers as specified in the Materials and Methods section. Next the PCR products obtained from the identified serotype a (A), serotype c (B), and serotype f (C) isolates were separated on 1% agarose gel. (D) LDS-PAGE analysis of extracellular proteins of *Aa* with serotype a and c. The gel was stained by SimplyBlue staining. The Molecular weight of marker proteins is indicated on the left.

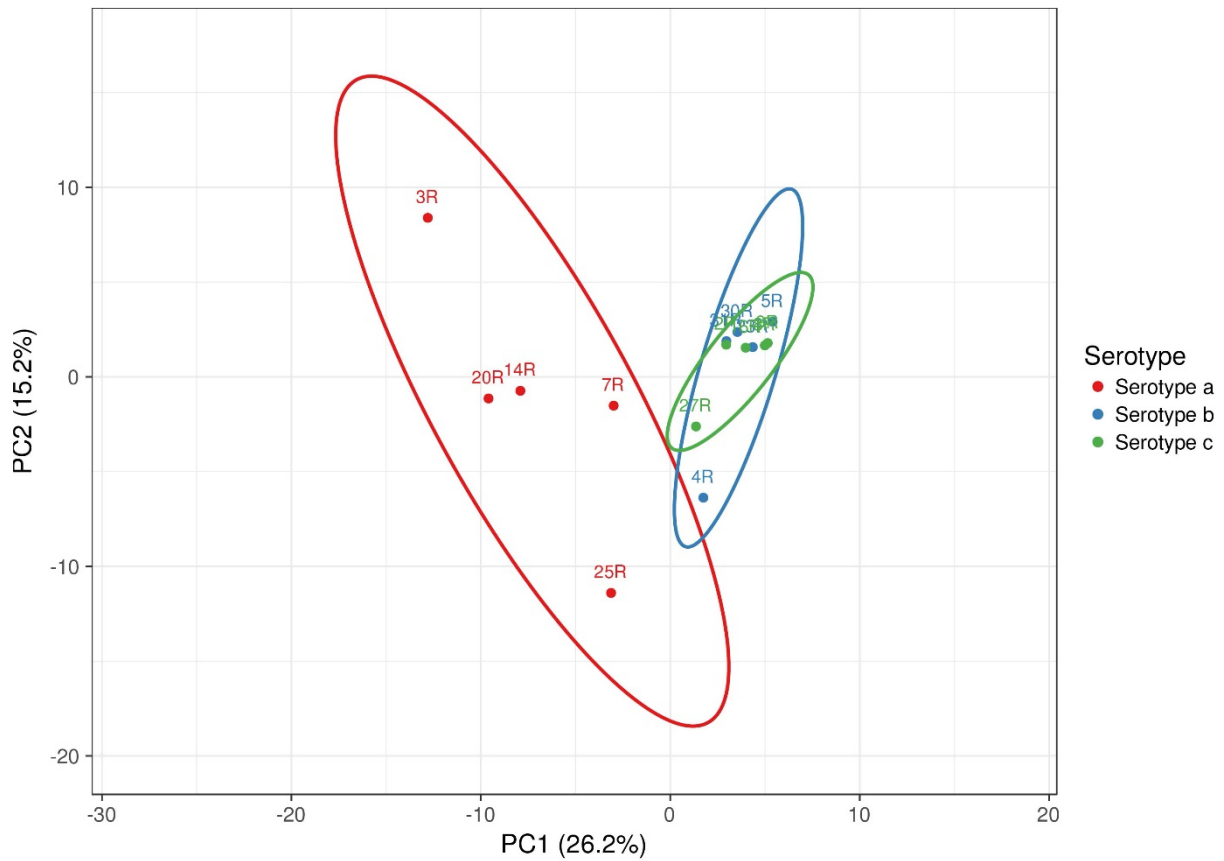

**Supplementary Figure S2. Principal component analysis (PCA) of all identified extracellular proteins of *Aa* with serotypes a, b or c except the outer membrane proteins (OMPs).** The plot is based on the normalized spectral counts of all identified proteins of these three serotypes except OMPs.

A

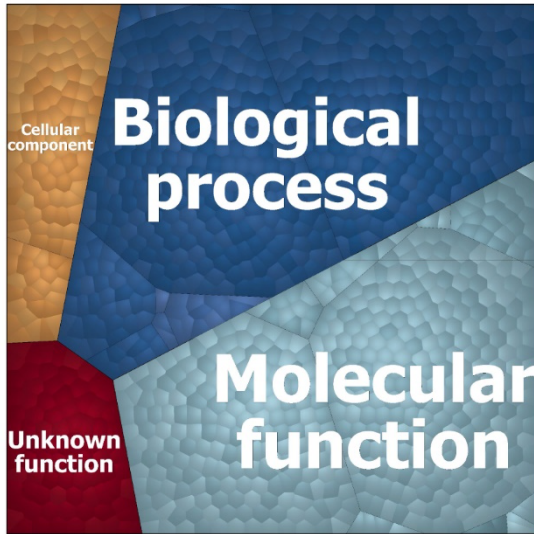

B

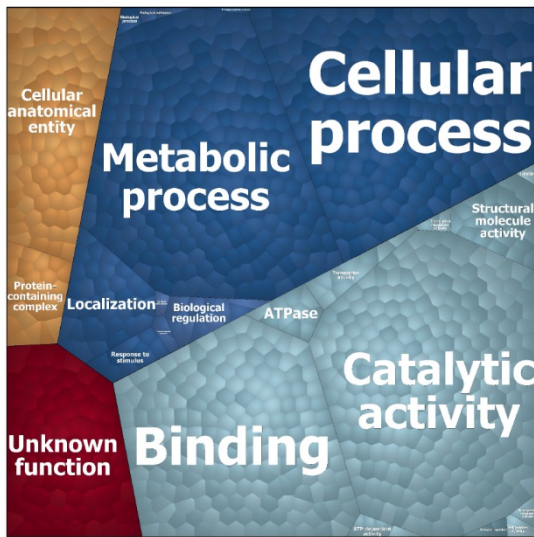

C

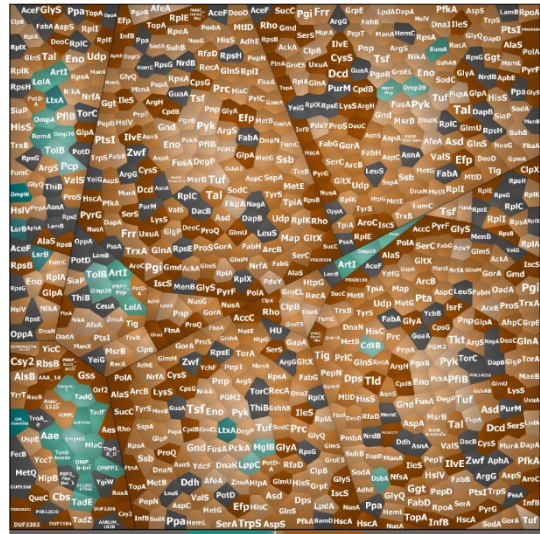

D

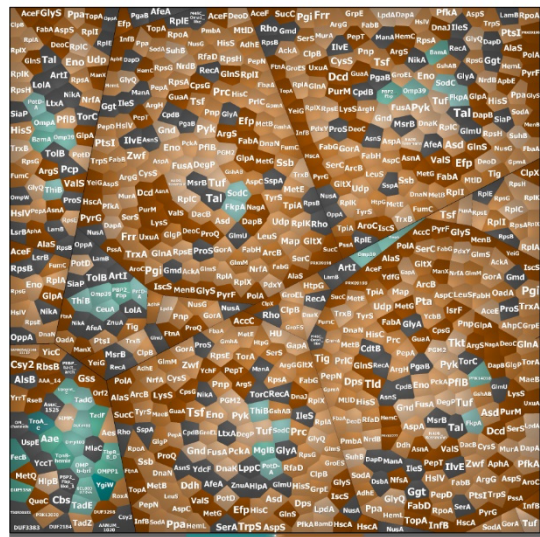

E

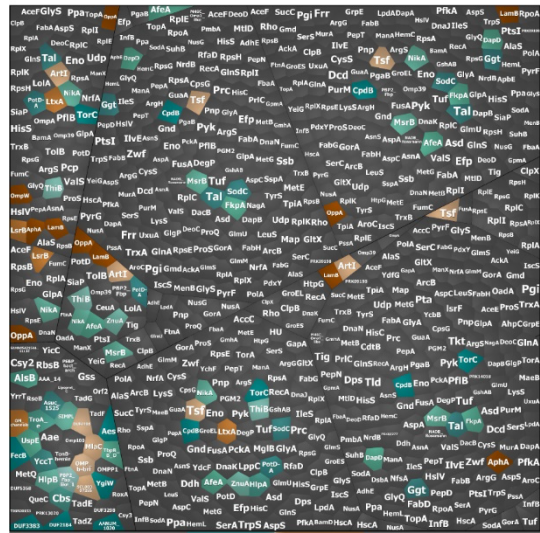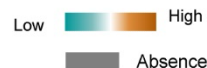

**Supplementary Figure S3. Voronoi treemaps of extracellular proteins from all A $\alpha$  isolates with different serotypes.** The functions of all identified extracellular proteins were predicted based on GO terms. The above panels show the functional categories of all identified extracellular proteins. The top-level functional categories of all identified extracellular proteins are indicated in (A), and the second-level functional categories are represented in (B). The panels C-E show the names of the different identified proteins within the respective functional categories with pairwise comparisons: (C) shows the comparison for the serotypes a versus b, (D) for serotypes a versus c, and (E) for serotypes b versus c. The images correspond to Figure 7 in the main manuscript.
